# Supplementary material for: Prevalence and associated factors of physical-psychological-cognitive multimorbidity in Chinese community-dwelling older adults: a cross-sectional study
Source: PeerJ. 2025 Jul 24;13:e19750. doi: 10.7717/peerj.19750 (PMC12296576; doi:10.7717/peerj.19750)
Supplement: Supplemental Information 1 [file peerj-13-19750-s001.xlsx]

## Sheet: Raw data
ID	gender	age	Source of income	Individual income monthly	Employment status	Number of children	Living alone	Chronic diseases	Smoking history in the past month	Alcohol consumption in the past month	Moderate-intensity physical activity weekly	Health insurance	Educational years	Marital status	Number of long-term medication types	Frequency of long-term medication use	Number of comorbidities	Duration of long-term medication use	Social frailty	EQ-5D-5L trade-off value	Depression	Cognitive disorder	PPC status
1	1	72	3	2	2	3	2	0	2	1	2	1	2	1	1	1	1	0	0	1	0	0	0
2	2	66	2	2	2	3	2	0	1	1	1	1	1	1	1	1	1	1	0	1	0	1	0
3	1	83	1	2	2	4	2	1	2	2	1	1	2	1	2	3	2	1	0	1	0	0	0
4	2	70	1	2	2	2	2	1	2	1	1	1	1	1	2	4	3	1	0	1	0	0	0
5	1	66	2	2	2	3	2	0	1	2	2	1	1	1	1	1	1	0	0	1	0	0	0
6	1	72	1	2	2	4	2	0	2	1	1	1	1	1	1	1	1	0	0	1	0	0	0
7	1	82	2	1	2	4	2	1	2	1	3	1	1	1	2	2	1	1	1	0.827145	1	1	1
8	2	81	2	1	2	4	2	1	2	2	2	1	1	1	2	2	2	1	0	0.628316	0	1	0
9	2	85	3	1	2	4	2	1	3	1	3	1	1	2	3	3	1	1	0	0.711271	1	0	0
10	1	61	3	1	1	3	1	0	1	1	5	1	2	1	1	1	1	0	0	0.950722	0	0	0
11	2	64	2	1	1	3	2	1	3	1	1	1	1	1	2	2	3	1	1	0.53663	1	1	1
12	2	74	1	1	2	2	2	0	3	1	3	1	4	2	2	4	1	1	0	0.950722	1	0	0
13	2	68	2	1	2	3	2	1	3	1	1	1	2	1	2	3	2	1	0	1	0	0	0
14	2	70	2	2	2	2	2	1	3	1	1	1	2	1	2	2	1	1	1	1	0	0	0
15	1	61	1	2	2	2	2	0	3	1	1	1	4	1	1	1	1	0	0	1	0	0	0
16	2	62	2	1	2	2	2	0	3	1	1	1	1	1	1	1	1	0	0	1	0	0	0
17	1	62	2	2	2	2	2	0	1	1	1	1	2	1	1	1	1	0	0	1	0	0	0
18	1	64	2	2	2	2	2	0	3	1	1	1	3	1	1	1	1	0	0	1	0	0	0
19	1	68	1	1	2	3	2	0	2	1	1	1	2	1	1	1	1	0	0	1	0	0	0
20	2	70	2	1	2	2	2	1	3	1	1	1	1	1	2	2	2	1	0	1	0	0	0
21	1	64	1	2	1	2	2	0	1	1	1	1	2	1	1	1	1	0	0	1	0	0	0
22	2	70	1	2	2	3	2	0	3	1	1	1	2	1	1	1	1	0	0	1	0	0	0
23	2	64	2	2	2	2	2	0	3	1	1	1	2	1	1	1	1	0	0	1	0	0	0
24	1	61	3	2	2	3	2	1	1	1	1	1	2	1	2	3	2	1	0	1	0	0	0
25	1	67	2	1	2	4	2	0	1	2	2	1	1	1	1	1	1	0	0	1	0	0	0
26	2	68	2	2	2	4	2	0	3	1	1	1	1	1	1	1	1	0	0	1	0	0	0
27	1	74	1	2	2	2	2	1	3	1	1	1	2	1	2	2	1	1	0	1	0	0	0
28	2	64	2	2	2	2	2	1	3	1	1	1	3	1	2	2	1	1	0	1	0	0	0
29	1	66	2	2	2	2	2	0	2	1	1	1	2	2	1	1	1	0	0	1	0	0	0
30	1	82	1	2	2	3	2	0	3	1	1	1	4	1	1	1	1	0	0	1	0	0	0
31	2	63	2	2	2	4	2	0	3	1	1	1	1	1	1	1	1	0	0	1	0	0	0
32	1	66	1	1	2	3	2	0	3	1	1	1	2	1	1	1	1	1	1	1	1	0	0
33	2	70	2	1	2	1	2	1	3	1	1	1	1	1	2	3	2	1	0	1	0	0	0
34	1	72	1	2	2	2	2	0	2	1	1	1	3	1	1	1	1	0	0	1	0	0	0
35	2	63	2	1	2	4	2	0	3	1	1	1	1	1	1	1	1	0	0	1	0	0	0
36	1	64	3	1	2	4	2	0	3	1	1	1	1	1	1	1	1	0	0	1	0	0	0
37	2	65	1	4	2	2	2	1	2	1	1	1	4	1	1	1	1	0	0	0.934105	0	1	0
38	1	65	2	1	2	1	2	1	2	1	1	1	3	1	1	1	2	0	0	1	0	0	0
39	2	68	1	1	2	2	2	1	3	1	1	1	1	2	2	3	2	1	0	1	0	0	0
40	2	68	1	1	2	2	2	1	3	1	1	1	1	2	2	3	2	1	0	1	0	0	0
41	2	60	1	2	1	3	2	0	3	1	1	1	2	1	1	1	1	0	0	1	0	0	0
42	1	70	2	2	2	2	2	0	2	1	1	1	1	1	1	1	1	0	0	1	0	0	0
43	2	70	2	1	2	4	2	0	3	1	1	1	1	1	1	1	1	0	0	1	0	0	0
44	1	66	2	2	2	2	2	0	1	1	1	1	1	1	1	1	1	1	0	0.686953	0	0	0
45	1	70	1	1	1	1	1	0	1	1	1	0	1	2	1	1	1	1	0	0.71296	0	0	0
46	2	67	3	2	2	3	2	1	3	1	1	1	1	1	2	1	2	1	0	1	1	1	1
47	1	76	3	4	2	4	1	1	3	1	1	0	2	2	2	2	3	1	1	0.686953	1	0	0
48	2	80	1	2	2	2	2	0	3	1	1	1	3	1	1	1	1	1	0	0.893995	0	0	0
49	1	65	2	1	2	4	2	1	2	1	1	1	2	1	2	3	3	1	0	1	0	0	0
50	2	66	1	2	2	2	2	0	3	1	1	1	2	1	1	1	1	0	0	1	0	0	0
51	1	75	2	1	2	2	2	1	2	1	1	1	3	1	2	3	2	1	0	1	0	0	0
52	2	67	2	1	2	4	2	0	3	1	1	1	1	1	1	1	1	0	0	1	0	0	0
53	1	70	1	3	2	2	2	1	2	2	2	1	4	1	2	2	1	1	0	1	0	0	0
54	1	78	1	2	2	2	2	1	2	2	1	1	2	1	2	3	3	1	0	1	0	0	0
55	2	78	2	1	2	4	2	1	3	1	1	1	1	1	2	3	2	1	0	1	0	0	0
56	1	86	2	1	2	4	2	1	1	3	2	1	2	1	2	3	3	1	0	1	0	0	0
57	1	80	2	1	2	4	2	0	1	1	1	1	2	1	1	1	1	0	0	1	0	0	0
58	2	79	1	4	2	2	2	0	3	1	1	1	2	1	1	1	1	0	0	1	0	0	0
59	1	75	2	1	2	4	2	1	1	2	1	1	2	1	2	3	3	1	0	1	0	0	0
60	1	90	1	2	2	2	2	1	2	1	1	1	3	2	2	3	2	1	0	0.734319	0	0	0
61	1	70	2	1	2	4	2	0	2	1	1	1	1	1	1	1	1	0	0	0.950722	0	0	0
62	2	66	2	1	2	4	2	0	3	1	1	1	1	1	1	1	1	0	0	1	0	0	0
63	1	78	1	2	2	2	2	1	1	1	1	1	2	1	2	2	2	1	0	1	0	0	0
64	2	67	2	2	2	3	2	0	2	1	1	1	2	1	1	1	1	0	0	1	0	0	0
65	1	60	1	2	2	2	2	0	2	1	1	1	2	1	1	1	1	0	0	1	0	0	0
66	1	70	1	2	2	2	2	0	2	1	1	1	3	1	1	1	1	0	0	1	0	0	0
67	1	70	2	2	2	2	2	0	2	1	1	1	2	2	1	1	1	0	0	1	0	0	0
68	1	70	2	1	2	2	2	0	2	1	1	1	3	1	1	1	1	0	0	1	0	0	0
69	1	60	2	2	2	2	2	0	3	1	1	1	3	1	1	1	1	0	0	1	0	0	0
70	1	70	1	2	2	2	2	0	3	1	1	1	2	1	1	1	1	0	0	1	0	0	0
71	1	80	2	2	2	2	2	0	3	2	1	1	1	1	1	1	1	0	0	1	0	0	0
72	2	70	1	2	2	2	2	0	3	1	1	0	1	1	1	1	1	0	0	1	0	0	0
73	1	60	2	2	2	2	2	0	3	1	1	1	1	1	1	1	1	0	0	1	0	0	0
74	2	67	2	2	2	2	2	0	3	1	1	1	1	1	1	1	1	0	0	1	0	0	0
75	1	70	2	1	2	4	2	1	3	1	1	1	1	1	3	4	3	1	0	1	0	0	0
76	1	80	2	2	2	2	2	1	2	1	1	1	2	1	2	3	2	1	0	1	0	0	0
77	1	70	2	1	2	2	2	1	2	1	1	1	1	1	1	1	2	0	0	1	0	0	0
78	2	60	2	2	2	4	2	0	2	1	1	1	1	1	1	1	1	0	0	1	0	0	0
79	2	60	2	2	2	2	2	0	3	1	1	1	2	1	1	1	1	0	0	1	0	0	0
80	1	68	1	2	2	2	2	0	1	3	1	1	2	1	1	1	1	0	0	0.950722	0	1	0
81	1	61	1	3	2	2	2	1	3	2	2	1	4	1	2	2	2	1	0	0.876423	0	0	0
82	2	80	1	2	2	2	2	0	3	1	1	1	2	1	1	1	1	0	0	1	0	0	0
83	1	65	1	1	2	2	2	0	1	1	1	1	3	1	1	1	1	0	0	1	0	0	0
84	1	67	1	2	2	2	2	0	2	1	1	1	2	1	1	1	1	0	0	0.254504	0	0	0
85	2	60	2	1	2	4	2	0	2	1	1	1	2	1	1	1	1	0	0	1	0	0	0
86	1	60	2	1	2	4	2	0	1	1	1	1	4	1	1	1	1	0	0	1	0	0	0
87	1	80	2	1	1	4	1	0	1	1	1	1	1	1	1	1	1	0	0	1	0	0	0
88	1	80	2	2	2	2	2	0	2	1	1	1	2	2	2	2	1	1	0	1	0	0	0
89	1	80	2	2	2	4	2	0	2	1	1	1	1	1	1	1	1	1	0	0.74352	0	0	0
90	1	79	2	2	2	2	2	0	2	1	1	1	1	1	1	1	1	0	0	1	0	0	0
91	2	60	2	2	2	2	2	0	1	1	1	1	2	1	1	1	1	0	1	1	0	0	0
92	1	70	2	1	2	4	2	0	3	1	1	1	2	1	1	1	1	0	0	1	0	0	0
93	2	60	2	2	2	2	2	1	2	1	1	1	1	1	2	2	2	1	0	1	0	0	0
94	1	60	1	2	2	4	2	0	2	2	1	1	1	1	1	1	1	0	0	0.950722	0	0	0
95	2	60	2	2	2	2	2	0	2	1	1	1	3	1	1	1	1	0	0	1	0	0	0
96	1	70	2	2	2	4	2	1	2	1	2	1	1	1	2	1	1	0	0	0.950722	0	0	0
97	1	92	1	3	2	2	2	1	2	2	1	1	4	1	1	2	1	1	0	0.934105	0	0	0
98	2	70	3	3	2	2	2	1	2	1	1	1	4	1	2	1	1	1	0	1	0	0	0
99	2	65	2	4	2	4	2	0	2	1	1	1	2	1	1	1	1	0	0	0.950722	0	0	0
100	2	68	2	2	2	2	2	1	2	1	1	1	4	1	2	4	3	1	0	1	0	0	0
101	1	69	2	2	2	2	2	1	3	1	2	1	4	1	2	2	2	1	0	1	0	0	0
102	1	70	1	2	2	2	2	0	3	1	1	1	3	1	1	1	1	0	0	0.699017	0	0	0
103	1	67	2	2	2	2	2	0	3	2	1	1	4	1	1	1	1	0	0	0.781941	0	0	0
104	2	88	2	2	2	2	2	1	2	1	1	1	4	1	1	1	3	1	0	0.610775	0	1	0
105	2	78	1	1	1	1	1	1	1	1	1	0	3	2	1	4	2	1	0	0.71296	1	1	1
106	1	85	2	1	1	3	2	1	1	1	2	1	3	2	1	2	3	1	0	0.84199	0	1	0
107	1	83	1	2	2	2	2	1	1	1	2	0	4	2	1	1	3	1	1	1	1	1	1
108	1	61	1	3	2	2	2	0	3	1	4	1	4	1	1	1	1	0	0	0.942318	0	0	0
109	2	67	1	3	2	2	2	1	2	1	2	1	3	1	1	1	2	1	1	1	0	0	0
110	1	91	1	2	2	4	1	1	3	1	4	1	1	1	2	3	1	1	1	0.876423	0	0	0
111	2	73	1	3	2	2	2	1	3	1	2	1	3	1	2	2	2	1	0	0.942318	0	0	0
112	1	66	1	3	2	2	2	1	3	1	1	1	2	1	1	2	3	1	0	0.8281	0	0	0
113	1	85	1	2	2	4	2	1	2	1	4	1	2	1	1	1	3	0	1	1	0	0	0
114	1	80	1	2	2	3	2	1	2	3	4	1	2	1	2	3	1	1	0	1	0	0	0
115	1	75	1	3	2	2	2	1	2	3	5	1	3	1	2	2	1	1	0	0.89304	0	0	0
116	1	61	1	2	2	2	2	1	1	2	4	1	2	1	2	2	3	1	0	0.942318	0	0	0
117	2	60	1	2	2	2	2	0	2	1	2	1	2	1	1	1	1	0	0	1	0	0	0
118	2	60	1	2	2	2	2	0	2	1	1	1	3	1	1	1	1	0	0	1	0	0	0
119	1	60	1	3	2	2	2	0	3	2	3	1	4	1	1	1	1	0	0	1	0	0	0
120	2	67	1	3	2	2	2	1	3	1	2	1	4	1	2	3	2	1	0	0.950722	0	1	0
121	2	62	1	2	2	2	2	1	2	2	1	1	4	1	2	2	3	1	0	0.89304	0	0	0
122	2	77	1	2	2	3	2	0	2	1	4	1	1	1	1	1	1	0	0	0.942318	0	0	0
123	1	65	1	3	2	2	2	1	1	3	2	1	3	1	2	4	1	1	0	0.876423	0	0	0
124	1	62	1	2	2	2	1	1	2	2	2	1	2	1	3	4	1	1	0	0.942318	0	0	0
125	2	65	1	1	2	2	2	0	2	3	2	1	3	1	1	1	1	0	0	1	0	0	0
126	1	71	1	3	2	2	2	1	3	1	1	1	2	1	2	2	3	1	0	0.795789	0	1	0
127	2	60	1	3	2	2	2	0	3	1	4	1	3	1	1	1	1	0	0	1	0	0	0
128	2	74	1	3	2	3	2	1	3	1	1	1	3	1	1	1	1	0	0	1	0	0	0
129	2	74	1	3	2	3	2	1	2	1	2	1	2	1	1	1	1	0	1	1	0	1	0
130	2	60	1	4	2	3	1	1	2	1	2	1	2	1	2	2	1	1	0	0.89304	1	1	1
131	1	76	1	4	2	3	1	1	2	1	1	1	1	1	1	1	1	0	0	0.942318	0	1	0
132	2	63	1	4	2	2	1	1	3	1	5	1	2	1	2	1	1	0	0	0.89304	1	1	1
133	1	72	3	1	2	2	1	1	1	2	1	0	2	2	2	3	3	1	0	0.89304	1	1	1
134	2	67	1	2	2	3	2	1	3	1	5	1	3	1	1	1	1	0	0	0.950722	0	1	0
135	1	65	2	4	2	3	2	0	1	3	2	1	2	2	1	1	1	0	0	0.942318	0	0	0
136	2	75	3	4	2	3	1	0	3	1	5	1	1	2	2	4	1	1	0	0.89304	1	1	0
137	2	78	1	4	2	3	1	1	3	1	4	1	3	1	2	2	2	1	0	0.942318	0	1	0
138	2	86	2	4	2	4	2	0	3	3	5	0	1	1	1	1	1	0	0	0.642204	0	0	0
139	1	71	3	4	2	3	2	0	3	1	2	1	1	1	1	1	1	0	0	1	0	0	0
140	2	86	1	4	2	4	2	0	3	2	1	1	2	1	1	1	1	0	0	0.861684	0	0	0
141	2	60	1	4	2	2	2	0	3	1	3	1	3	1	1	1	1	0	0	0.861684	0	0	0
142	2	80	1	4	2	3	2	1	3	1	1	1	1	2	2	2	1	1	0	0.942318	0	0	0
143	1	70	1	4	2	2	2	1	1	3	2	1	2	1	2	2	1	1	0	0.942318	0	1	0
144	1	61	1	4	2	2	2	1	1	1	1	1	3	1	2	4	2	1	1	0.746511	1	1	1
145	1	68	3	4	2	2	1	1	1	2	4	1	1	1	2	2	1	1	0	0.934105	0	1	0
146	2	75	2	4	2	3	1	0	3	1	5	1	1	2	1	1	1	0	0	0.893995	0	0	0
147	2	81	2	4	2	4	1	1	3	1	5	1	1	2	2	4	1	1	0	0.813361	0	1	0
148	2	64	3	4	2	2	2	0	3	1	5	1	1	1	1	1	1	0	0	1	0	0	0
149	2	88	2	4	2	4	1	1	3	1	5	1	1	2	2	4	1	1	0	0.942318	1	1	1
150	2	60	1	4	2	2	1	0	3	1	5	1	3	2	1	1	1	0	0	1	0	0	0
151	2	75	2	4	2	3	2	1	3	1	3	0	1	1	1	2	1	1	0	0.89304	0	0	0
152	2	88	2	4	2	3	2	1	3	1	1	1	1	2	2	2	2	1	0	0.876423	0	1	0
153	2	66	1	4	2	2	2	0	3	1	1	1	2	1	1	1	1	0	0	0.942318	0	0	0
154	2	62	1	4	2	2	2	0	3	3	3	1	1	1	1	1	1	0	0	1	0	0	0
155	2	61	1	4	2	2	2	1	3	1	1	1	2	1	2	2	1	1	0	0.942318	0	0	0
156	1	87	1	4	2	1	1	1	3	1	1	1	2	2	2	3	2	1	1	0.861684	0	0	0
157	2	84	1	4	2	3	2	0	3	1	1	1	1	1	2	3	1	1	0	0.942318	0	0	0
158	1	90	1	4	2	3	2	0	2	2	1	1	1	1	1	1	1	0	0	0.89304	1	0	0
159	1	61	1	4	2	2	2	1	1	3	1	1	2	1	2	2	1	1	0	1	0	0	0
160	2	90	3	4	2	2	2	0	3	1	1	1	1	2	1	1	1	0	1	0.734319	1	0	0
161	2	82	2	4	2	2	2	1	3	1	4	1	1	1	2	2	1	1	0	0.795789	1	1	1
162	2	73	1	4	2	3	1	1	3	1	1	1	2	1	2	2	1	1	0	1	0	0	0
163	2	73	2	4	2	4	2	0	3	1	1	1	1	1	1	1	1	0	0	0.861684	0	0	0
164	2	91	2	4	2	4	2	1	2	1	3	1	1	2	1	1	1	1	0	0.83192	1	1	1
165	2	95	1	4	2	3	1	1	3	1	3	1	2	2	2	4	2	1	1	0.8281	1	1	1
166	1	68	1	4	2	2	2	1	1	3	3	1	3	1	3	2	2	1	1	0.668434	0	1	1
167	1	85	1	4	2	3	2	1	3	3	1	1	4	1	2	2	3	1	1	1	0	0	0
168	1	70	1	2	2	3	2	1	2	3	2	1	3	1	1	1	1	1	0	1	0	0	0
169	2	70	1	4	2	2	2	1	3	1	5	1	2	1	3	2	3	1	0	1	0	0	0
170	2	73	1	4	2	2	2	1	3	1	2	1	2	2	2	2	1	1	0	1	0	0	0
171	1	80	1	2	2	3	1	0	2	2	5	1	1	1	1	1	1	0	0	1	0	0	0
172	2	75	1	3	2	2	2	0	1	3	5	1	2	1	1	1	1	0	0	1	0	0	0
173	2	61	1	3	2	2	2	1	3	2	4	1	2	1	2	2	1	1	0	1	0	0	0
174	1	63	1	1	2	3	1	1	3	1	2	1	2	1	2	3	2	1	0	1	1	1	1
175	2	60	1	1	2	1	2	1	3	1	2	1	2	1	2	3	2	1	0	0.942318	0	1	0
176	2	65	1	1	2	4	2	1	3	1	3	1	2	1	2	3	3	1	0	1	1	1	1
177	1	69	1	1	2	4	2	1	3	1	3	1	2	1	2	3	3	1	0	1	1	1	1
178	1	66	1	2	2	4	2	1	3	2	2	1	2	1	2	4	3	1	0	1	1	1	1
179	1	62	1	1	2	3	2	1	3	1	2	1	2	1	1	2	3	1	0	1	1	1	1
180	2	62	1	1	2	3	1	1	1	1	2	1	1	1	2	1	2	1	0	0.942318	1	1	1
181	2	61	2	4	2	3	2	1	3	1	3	1	2	1	2	3	2	1	0	0.942318	1	1	1
182	1	68	2	4	2	3	1	1	3	1	2	1	1	1	2	2	2	1	0	1	1	1	1
183	1	63	1	2	2	4	2	1	3	1	2	1	2	1	2	3	3	1	0	0.942318	0	1	0
184	1	66	1	2	2	4	2	1	3	1	2	1	2	1	2	2	3	1	0	0.942318	1	1	1
185	1	61	1	2	2	4	2	1	3	1	2	1	2	1	2	3	3	1	0	0.942318	0	1	0
186	1	68	3	3	2	3	2	0	3	1	3	1	3	1	1	1	1	0	0	1	0	0	0
187	2	62	1	2	2	2	1	1	3	1	4	1	4	2	1	1	1	0	0	0.89304	1	1	1
188	2	69	1	3	2	2	2	1	3	1	3	1	3	1	2	2	2	1	0	0.942318	1	1	1
189	1	64	3	1	2	4	2	1	1	3	1	1	1	1	2	3	2	1	0	0.89304	1	1	1
190	1	61	1	2	2	2	2	1	1	3	2	1	4	1	2	2	2	1	0	0.942318	0	1	0
191	2	65	1	2	2	2	2	0	3	1	3	1	2	1	1	1	1	0	0	1	0	0	0
192	1	62	1	1	2	3	2	1	3	1	2	1	1	1	2	3	3	1	0	0.942318	0	1	0
193	2	65	1	2	2	4	2	1	3	1	2	1	2	1	2	3	3	1	0	0.942318	0	1	0
194	2	62	1	2	2	4	2	1	3	1	2	1	2	1	2	4	3	1	0	0.942318	1	1	1
195	1	61	1	2	2	4	2	1	3	1	3	1	2	1	2	4	3	1	0	0.942318	1	1	1
196	1	63	1	2	2	3	2	1	3	1	3	1	2	1	2	4	3	1	0	1	1	1	1
197	2	65	1	2	2	3	2	1	3	1	3	1	2	1	2	4	3	1	0	0.942318	0	1	0
198	1	62	1	2	2	4	2	1	3	1	2	1	2	1	2	3	3	1	0	0.942318	1	1	1
199	1	61	3	3	1	2	2	0	3	1	2	1	1	1	1	1	1	0	0	0.955497	0	0	0
200	2	72	1	2	2	3	2	1	3	1	2	1	1	1	1	1	1	0	0	0.89304	0	0	0
201	1	78	3	4	2	4	1	1	3	1	4	1	4	1	3	4	3	1	0	0.751286	1	1	1
202	1	72	1	4	2	3	1	1	1	3	4	1	1	1	2	3	1	1	0	1	0	0	0
203	2	72	1	4	2	3	2	1	3	1	5	1	1	1	2	1	1	1	1	0.861684	0	1	1
204	1	74	1	4	2	3	2	1	2	1	1	1	1	1	3	4	3	1	1	0.56157	1	1	1
205	2	75	2	4	2	4	2	1	3	1	1	1	1	2	3	4	1	1	1	0.512442	1	0	0
206	1	71	2	4	2	4	2	0	1	3	5	1	2	1	1	1	1	0	0	1	0	0	0
207	2	95	1	4	2	4	2	1	3	1	1	1	4	2	3	2	2	1	1	0.455037	1	1	1
208	2	78	2	4	2	4	2	0	3	1	2	1	1	1	1	1	1	0	0	0.942318	1	0	0
209	2	72	3	4	2	3	1	1	3	1	1	1	1	2	2	4	1	1	1	0.812406	1	0	0
210	1	84	2	4	2	3	2	1	3	1	1	1	1	1	2	4	1	1	1	0.18983	1	1	1
211	1	66	3	4	1	4	2	0	2	3	4	1	1	1	1	1	1	0	1	1	0	0	0
212	2	71	1	4	2	3	2	0	3	1	2	1	2	1	1	1	1	0	0	1	0	0	0
213	2	81	2	1	2	4	1	1	3	1	1	0	1	2	3	4	3	1	1	0.03627	1	1	1
214	1	84	1	4	2	4	2	1	3	1	1	1	2	2	3	4	2	1	0	0.353952	1	1	1
215	1	78	1	4	2	2	2	1	2	1	1	1	1	2	3	4	2	1	1	0.22696	1	1	1
216	2	78	1	4	2	1	1	1	2	1	2	1	1	1	2	4	2	1	1	0.702963	0	1	0
217	2	63	1	2	2	4	2	1	3	1	2	1	2	1	2	3	3	1	0	0.942318	0	1	0
218	1	64	1	2	2	3	2	1	3	1	2	1	2	1	2	4	3	1	0	0.942318	1	1	1
219	1	64	1	2	2	4	2	1	3	1	2	1	2	1	2	4	3	1	0	0.942318	0	1	1
220	1	66	1	2	2	4	2	1	3	1	2	1	2	1	2	3	3	1	0	0.942318	1	1	1
221	1	63	1	1	2	3	2	0	2	1	4	1	2	1	1	1	1	0	0	1	0	0	0
222	2	62	1	2	2	4	2	1	3	1	2	1	2	1	2	4	3	1	0	0.942318	0	1	0
223	1	68	1	4	2	3	1	1	3	1	1	1	1	1	2	2	2	1	0	1	1	1	1
224	1	73	1	4	2	4	2	1	3	1	1	1	2	1	1	1	2	1	0	0.942318	1	1	1
225	1	73	3	1	2	3	1	1	1	2	1	1	2	2	2	4	2	1	1	1	1	1	1
226	1	62	1	2	2	3	2	0	3	1	2	1	4	1	1	1	1	0	0	1	0	0	0
227	2	72	3	2	2	4	2	0	3	1	2	1	2	1	2	4	1	1	1	0.695197	1	1	0
228	1	65	3	2	2	3	2	1	1	3	1	1	2	1	2	3	3	1	0	0.89304	1	1	1
229	1	66	1	2	2	4	2	1	3	1	2	1	2	1	2	3	3	1	0	0.942318	1	1	1
230	2	71	1	2	2	2	2	1	3	1	2	1	4	1	2	3	2	1	1	0.53408	1	1	1
231	1	72	1	2	2	2	2	0	3	1	3	1	1	1	1	1	1	0	0	1	0	0	0
232	2	80	1	3	2	3	1	1	3	2	1	1	4	2	2	3	2	1	1	0.778822	1	1	1
233	1	62	3	3	2	2	2	1	1	3	1	1	4	1	1	1	1	0	0	1	1	0	0
234	2	62	1	3	2	2	2	1	1	2	3	1	4	1	1	1	2	0	0	0.89304	1	1	1
235	2	71	1	2	2	3	2	1	2	2	2	1	3	1	2	2	2	1	0	0.89304	1	1	1
236	1	76	1	2	2	3	2	0	2	1	1	1	2	1	1	1	1	0	0	1	0	0	0
237	2	72	2	1	2	3	2	0	3	1	2	1	1	1	2	3	1	1	0	0.702008	1	1	0
238	2	61	1	1	2	3	1	0	3	1	2	1	2	2	1	1	1	0	0	1	0	0	0
239	2	66	1	2	2	2	2	1	3	1	2	1	2	1	2	2	1	1	0	0.942318	1	0	0
240	1	66	1	3	2	2	2	0	2	1	1	1	4	1	1	1	1	0	0	1	0	0	0
241	2	75	3	4	2	4	2	0	3	1	2	1	2	1	1	1	1	0	0	1	0	0	0
242	2	65	1	3	2	3	2	0	2	1	1	1	4	1	1	1	1	0	0	1	0	0	0
243	1	60	1	4	2	2	2	1	1	1	1	1	3	1	3	4	2	1	1	0.827145	1	1	1
244	1	72	1	3	2	2	1	0	2	1	1	1	4	2	1	1	1	0	0	1	0	0	0
245	2	66	3	4	2	2	1	1	3	1	1	1	1	1	1	1	1	0	1	0.069828	0	1	0
246	2	72	1	3	2	1	1	0	3	1	1	1	3	2	1	1	1	0	0	1	0	0	0
247	2	75	1	4	2	3	2	0	3	1	2	1	2	1	1	1	1	0	0	1	0	1	0
248	1	78	1	4	2	4	2	1	3	1	2	1	3	1	2	4	2	1	0	0.876423	0	0	0
249	2	77	1	3	2	1	1	1	2	1	2	1	4	2	2	2	1	1	0	1	0	0	0
250	1	68	3	4	1	3	2	1	2	1	1	1	4	1	2	3	1	1	1	0.836504	1	0	0
251	1	61	1	2	1	2	2	0	2	1	2	1	4	1	1	1	1	0	0	1	0	0	0
252	1	78	1	4	2	4	2	1	3	1	5	1	2	1	2	3	1	1	0	0.89304	0	1	0
253	2	62	1	2	2	3	2	0	3	1	1	1	1	1	1	1	1	0	0	1	0	0	0
254	2	64	3	4	2	3	1	1	3	1	2	1	3	1	1	1	1	0	0	1	0	0	0
255	2	70	3	4	2	3	2	1	2	1	4	1	2	1	2	4	1	1	0	0.861684	0	1	0
256	2	70	1	3	2	4	1	0	3	1	2	1	1	1	1	1	1	0	1	0.861684	0	0	0
257	1	85	1	3	2	4	2	1	3	1	1	1	3	1	3	4	1	1	1	0.295992	1	1	1
258	1	68	3	2	2	2	2	0	1	3	5	1	2	1	1	1	1	0	0	0.89304	0	0	0
259	2	66	1	4	2	3	1	1	3	1	2	1	2	1	3	4	2	1	1	0.31886	1	1	1
260	2	65	1	4	2	2	2	0	3	1	5	1	2	1	1	1	1	0	0	1	0	0	0
261	2	61	1	3	2	2	1	0	3	1	5	1	2	1	1	1	1	0	0	1	0	0	0
262	1	62	1	4	2	2	2	1	3	2	5	1	1	2	2	2	2	1	0	0.950722	0	0	0
263	2	71	1	3	2	2	2	1	3	1	5	1	1	1	2	2	1	1	0	1	0	0	0
264	2	90	1	2	2	4	1	1	3	1	4	1	1	1	2	2	3	1	0	1	0	0	0
265	2	62	1	3	2	4	2	0	3	1	5	1	2	1	1	1	1	0	0	1	0	0	0
266	1	75	1	3	2	2	1	0	3	3	1	1	1	1	2	2	1	1	0	1	0	0	0
267	2	70	3	4	2	2	2	1	3	1	1	1	1	1	1	1	2	0	0	1	1	0	0
268	2	60	1	2	2	2	1	1	3	1	2	1	1	2	1	1	1	1	0	0.73503	0	1	0
269	1	74	1	3	2	2	2	0	1	1	3	1	3	1	1	1	1	0	0	1	0	0	0
270	1	70	1	1	2	3	2	1	1	1	1	1	4	1	1	1	2	1	0	0.942318	0	0	0
271	2	65	3	4	1	3	2	1	3	1	2	1	1	2	1	1	1	1	0	0.89304	1	0	0
272	2	70	1	2	2	2	2	0	2	2	5	1	1	1	1	1	1	0	0	1	0	0	0
273	1	80	1	2	2	3	2	1	3	1	5	1	3	1	2	3	2	1	0	1	0	1	0
274	1	73	1	2	2	2	2	0	2	1	5	1	2	1	1	1	1	0	0	1	0	0	0
275	1	71	1	1	2	2	1	1	2	1	5	1	2	2	2	2	1	1	1	0.848537	1	1	1
276	2	70	3	1	2	3	2	1	3	1	2	1	1	1	3	4	1	1	0	0.639797	1	1	1
277	1	75	1	2	2	3	2	1	1	3	2	1	3	1	1	1	1	1	0	1	0	1	0
278	2	72	1	2	2	2	1	0	2	1	5	1	2	1	1	1	1	0	0	1	0	0	0
279	2	80	1	3	2	3	2	1	3	1	3	1	2	1	3	4	3	1	1	0.942318	1	1	1
280	2	72	1	2	2	2	2	1	3	1	3	1	2	1	2	2	1	1	0	0.89304	1	0	0
281	2	71	1	3	2	3	2	1	2	1	5	1	1	1	2	3	1	1	0	0.795789	0	0	0
282	1	60	3	4	1	2	2	1	3	1	1	0	3	1	2	2	1	1	0	0.89304	0	0	0
283	2	72	1	3	2	2	2	1	3	1	1	1	1	1	2	2	1	1	0	1	0	0	0
284	2	60	2	4	1	2	1	1	2	1	5	1	2	1	2	4	2	1	0	0.53408	0	0	0
285	2	74	2	4	2	3	1	1	3	1	2	0	1	2	2	3	2	1	1	0.844717	0	0	0
286	1	69	1	4	2	2	2	1	1	3	5	1	2	1	3	2	1	1	0	0.748736	0	1	0
287	2	67	1	3	2	2	2	1	3	1	1	1	3	1	2	2	1	1	0	0.942318	0	0	0
288	1	70	3	2	2	2	1	1	2	2	5	1	3	1	1	1	1	0	0	0.942318	0	0	0
289	1	70	1	3	2	2	2	1	2	1	3	1	1	1	3	4	3	1	0	0.748736	0	1	0
290	1	72	1	4	2	3	1	1	2	1	5	0	2	1	2	3	2	1	1	0.942318	0	0	0
291	1	72	2	2	2	4	2	0	1	1	1	1	3	1	1	1	1	0	0	1	0	0	0
292	1	73	1	4	2	2	1	1	1	1	5	1	2	1	2	4	2	1	0	0.530141	0	0	0
293	1	65	1	1	2	3	2	1	1	2	1	1	2	1	1	1	3	0	0	0.942318	0	0	0
294	1	72	1	2	2	3	1	1	2	1	1	1	2	1	2	4	1	1	1	0.409492	1	1	1
295	1	84	3	4	2	3	1	0	2	1	1	0	1	2	2	4	1	1	1	0.698188	1	1	0
296	2	79	2	2	2	3	2	1	3	1	1	1	1	1	3	4	2	1	1	0.812406	1	1	1
297	2	67	2	1	2	3	2	1	2	1	5	0	2	1	1	1	1	0	0	0.727662	0	0	0
298	1	83	2	2	2	3	2	1	3	1	3	1	1	1	2	4	1	1	0	0.74352	0	1	0
299	1	84	2	1	2	4	2	0	1	1	2	1	1	1	1	1	1	0	1	1	0	0	0
300	2	84	1	4	2	4	2	1	3	1	5	1	1	1	2	3	2	1	0	0.654396	0	1	0
301	1	78	1	2	2	4	2	1	3	1	3	1	1	1	2	4	1	1	0	0.89304	0	1	0
302	2	82	1	3	2	4	1	1	3	1	1	1	2	1	3	4	3	1	1	-0.391	1	1	1
303	2	90	1	4	2	4	2	0	3	1	2	1	3	2	2	2	1	1	0	0.876423	1	0	0
304	2	74	1	4	2	2	1	0	3	1	1	1	1	2	3	4	1	1	1	0.425133	1	1	0
305	1	80	1	4	2	3	1	0	2	2	3	1	2	1	1	1	1	0	0	1	0	0	0
306	1	85	1	4	2	4	2	1	3	1	1	1	3	1	2	4	3	1	0	0.942318	0	0	0
307	2	83	1	4	2	4	1	1	3	1	1	1	1	2	2	2	1	1	1	0.950722	0	0	0
308	1	78	1	3	2	3	2	1	3	1	4	1	4	1	2	4	1	1	0	1	0	0	0
309	1	62	1	3	2	3	2	0	1	2	2	1	4	1	1	1	1	0	0	0.654396	1	0	0
310	2	82	1	4	2	4	1	1	3	1	2	1	1	1	2	4	1	1	0	0.876423	0	0	0
311	2	85	1	4	2	4	2	1	3	1	5	1	3	2	3	4	3	1	0	0.942318	0	0	0
312	2	81	1	4	2	3	1	1	3	1	3	1	3	2	1	1	1	0	0	1	1	0	0
313	2	72	2	4	2	3	2	0	3	1	1	1	1	1	1	1	1	0	1	0.942318	0	0	0
314	1	80	1	2	2	3	2	1	2	1	1	1	4	1	3	4	1	1	0	-0.251164	0	0	0
315	2	73	2	4	2	3	1	1	3	1	5	0	1	1	2	3	3	1	0	0.942318	0	0	0
316	1	75	3	1	2	4	2	1	3	1	1	1	2	1	3	3	2	1	1	0.797487	0	1	0
317	1	86	1	4	2	4	2	1	1	1	1	1	2	1	3	4	2	1	1	0.815941	0	1	0
318	2	70	1	4	2	2	2	0	3	1	2	1	3	1	1	1	1	0	0	0.827145	0	0	0
319	1	90	2	2	2	4	2	1	3	1	1	0	1	2	3	4	3	1	1	0.561751	1	1	1
320	2	69	1	3	2	2	2	1	3	1	1	1	3	1	1	1	1	0	0	0.942318	0	0	0
321	2	90	2	4	2	4	2	1	3	1	1	0	1	2	2	2	1	1	1	0.942318	0	1	0
322	1	66	1	4	2	4	2	1	3	1	1	1	2	1	2	2	1	1	1	0.942318	0	1	0
323	2	80	2	4	2	4	1	1	3	1	1	1	1	1	2	4	2	1	1	-0.340264	1	1	1
324	1	66	1	4	2	2	2	1	3	1	1	1	4	1	2	2	1	1	0	0.942318	0	0	0
325	2	80	2	4	2	3	1	0	2	2	3	0	1	2	1	1	1	0	0	1	0	0	0
326	2	70	1	3	2	1	2	0	3	1	1	1	4	1	1	1	1	0	0	1	0	0	0
327	1	91	1	4	2	4	2	1	3	1	5	1	2	2	2	4	1	1	0	0.8281	0	0	0
328	2	95	1	4	2	4	2	1	3	1	2	1	4	2	2	4	1	1	1	-0.124318	1	1	1
329	2	86	1	4	2	3	1	1	3	1	5	1	3	2	2	4	1	1	0	0.893995	0	1	0
330	1	83	2	4	2	4	1	0	3	1	1	1	2	1	1	1	1	0	0	1	1	1	0
331	2	66	3	4	2	2	2	1	3	1	5	1	1	1	2	4	2	1	0	1	1	1	1
332	1	80	1	3	2	4	2	0	1	1	2	1	2	2	1	1	1	0	0	1	0	0	0
333	1	79	2	2	2	3	2	1	3	1	2	1	2	1	2	2	1	1	1	0.942318	0	0	0
334	1	91	1	4	2	4	2	1	3	1	1	1	4	1	2	4	1	1	0	0.942318	0	0	0
335	2	88	1	4	2	3	2	0	1	2	1	1	2	1	1	1	1	0	0	1	0	0	0
336	2	81	1	3	2	3	2	1	3	1	1	1	3	2	1	1	1	0	0	1	0	0	0
337	2	86	1	4	2	3	2	1	3	1	2	1	3	2	2	4	1	1	0	1	0	0	0
338	2	87	1	4	2	3	1	0	3	1	1	1	2	2	2	2	1	1	0	1	0	0	0
339	1	93	1	4	2	4	2	0	2	1	2	1	2	2	1	2	1	1	0	0.950722	0	0	0
340	2	79	2	4	2	3	1	0	3	1	2	1	3	2	1	1	1	0	0	1	0	0	0
341	1	90	1	4	2	2	2	0	3	1	2	1	4	2	1	1	1	0	1	1	0	0	0
342	1	80	1	4	2	3	2	0	1	2	2	1	4	1	1	1	1	0	1	0.950722	0	0	0
343	1	79	1	4	2	3	1	0	3	1	1	1	2	1	1	1	1	0	1	1	0	0	0
344	2	81	1	4	2	3	2	0	3	1	1	1	1	2	1	1	1	0	0	1	0	0	0
345	1	66	2	4	2	3	2	0	2	1	5	1	2	1	1	1	1	0	0	1	0	0	0
346	2	82	1	4	2	2	1	1	3	1	2	1	3	2	3	4	2	1	1	0.381071	1	0	0
347	1	81	2	4	2	4	1	1	3	1	5	1	1	2	2	4	1	1	0	0.052128	1	0	0
348	2	89	1	4	2	4	1	1	3	1	4	1	1	2	1	1	1	0	0	0.818231	1	0	0
349	1	88	1	4	2	4	2	1	3	1	5	1	1	1	2	2	1	1	0	0.942318	0	1	0
350	2	76	1	4	2	4	1	1	3	1	5	1	1	2	2	4	1	1	0	1	0	1	0
351	1	80	1	4	2	3	2	0	3	2	5	1	3	2	1	1	1	0	0	1	0	0	0
352	2	90	1	4	2	4	2	0	3	1	5	0	2	2	1	1	1	0	0	1	0	0	0
353	1	87	1	4	2	3	2	0	3	1	5	1	2	2	2	3	1	1	0	0.934105	0	0	0
354	1	84	1	2	2	3	2	1	2	2	1	1	1	2	2	3	1	1	0	0.030684	0	0	0
355	1	86	1	3	2	3	2	1	2	1	1	1	4	1	1	2	1	1	1	0.620134	1	1	1
356	1	76	1	1	2	3	2	1	2	2	1	1	3	1	2	2	2	1	0	1	0	0	0
357	1	71	1	3	2	2	2	1	2	1	1	1	3	1	2	3	2	1	0	1	0	0	0
358	2	68	1	2	2	2	2	0	2	1	1	1	3	1	1	1	1	0	0	1	0	0	0
359	2	88	1	3	2	3	1	0	3	1	5	1	2	2	2	1	1	1	0	1	0	0	0
360	1	85	1	4	2	4	1	1	3	1	5	1	4	2	2	2	1	1	0	0.876423	0	0	0
361	2	72	1	3	2	3	2	0	3	1	5	1	1	1	1	1	1	0	0	1	0	0	0
362	2	86	1	3	2	4	1	0	3	2	1	1	1	2	1	1	1	0	0	1	0	0	0
363	1	75	1	3	2	3	2	0	1	3	2	1	1	1	1	1	1	0	0	1	0	0	0
364	1	61	1	3	2	2	2	1	3	2	4	1	2	1	2	3	2	1	0	1	0	0	0
365	1	74	1	3	2	3	2	0	3	2	2	1	2	1	1	1	1	0	0	1	0	0	0
366	1	84	1	2	2	4	1	1	3	1	5	1	1	2	2	3	1	1	1	0.783597	0	1	0
367	2	73	1	4	2	2	2	0	2	1	5	1	1	2	1	1	1	0	0	1	0	0	0
368	1	67	1	3	2	2	1	1	2	1	5	0	1	2	2	4	1	1	1	0.934105	1	1	1
369	1	60	3	2	2	4	2	0	3	1	1	1	2	1	1	1	1	0	0	1	0	0	0
370	2	70	2	2	2	4	2	1	3	1	1	1	1	1	2	4	1	1	0	1	1	0	0
371	1	72	2	2	2	4	2	1	1	2	3	1	2	1	2	3	1	1	0	1	1	0	0
372	1	70	1	3	2	2	2	0	3	3	2	1	1	1	1	1	1	0	0	1	0	0	0
373	2	72	1	3	2	2	2	0	3	2	2	1	1	1	1	1	1	0	0	1	0	0	0
374	2	70	2	3	2	2	2	0	3	1	1	1	1	1	1	1	1	0	0	1	0	0	0
375	2	65	2	3	2	2	1	0	3	1	1	1	1	1	1	1	1	0	0	1	0	0	0
376	1	79	1	4	2	4	1	0	1	1	1	1	1	2	1	1	1	0	1	1	0	0	0
377	1	76	3	1	2	1	2	1	2	2	1	1	1	2	1	1	3	0	0	0.13187	1	1	1
378	2	69	3	4	2	2	2	0	3	1	5	1	1	1	1	1	1	0	0	1	1	0	0
379	1	68	3	4	2	2	2	0	3	3	5	1	1	1	1	1	1	0	0	1	0	0	0
380	2	65	3	4	2	3	2	1	3	1	5	1	1	1	1	1	1	0	0	1	0	0	0
381	2	88	2	4	2	4	2	0	3	1	2	1	1	2	2	3	1	1	0	0.778822	0	0	0
382	1	75	3	1	1	1	2	1	1	1	3	1	1	1	1	1	1	1	0	1	0	0	0
383	1	73	2	2	2	4	2	1	2	1	3	1	2	2	2	3	1	1	0	1	0	1	0
384	2	71	3	1	1	1	2	1	3	1	5	1	1	1	2	3	1	1	0	0.698188	0	0	0
385	1	68	1	2	2	3	2	0	2	1	3	1	3	2	1	1	1	0	0	1	1	1	0
386	1	83	1	3	2	3	2	0	2	1	5	1	4	1	1	1	1	0	0	1	0	0	0
387	2	77	1	1	2	2	1	1	1	2	2	1	1	2	2	3	2	1	0	0.836504	0	1	0
388	2	73	1	1	2	2	2	1	2	1	3	1	2	2	2	3	1	1	0	1	0	1	0
389	2	75	1	2	2	3	2	0	2	1	4	1	3	2	1	1	1	0	0	0.893995	0	0	0
390	1	80	1	3	2	3	2	0	3	1	4	1	3	2	1	1	1	0	0	1	0	0	0
391	1	68	2	4	2	2	2	1	3	1	1	0	1	1	2	4	1	1	1	0.783597	1	0	0
392	1	63	3	4	1	1	1	1	1	2	2	1	1	2	1	1	1	0	1	0.950722	0	0	0
393	2	85	1	2	2	3	1	1	3	1	4	1	4	1	3	4	2	1	0	0.942318	0	0	0
394	2	61	1	3	2	2	1	1	3	1	4	1	4	1	2	3	1	1	0	0.942318	0	0	0
395	2	73	1	4	2	4	2	1	3	1	4	1	1	1	2	2	3	1	0	0.827145	0	0	0
396	2	90	1	4	2	4	1	1	3	1	1	1	1	2	2	4	2	1	0	0.861684	0	1	0
397	2	66	2	4	1	2	2	1	3	1	1	0	1	1	3	4	2	1	1	1	0	0	0
398	2	63	2	2	1	3	1	0	2	1	5	1	1	1	2	4	1	1	0	0.942318	0	0	0
399	1	84	2	1	2	3	1	1	2	1	1	0	1	1	3	4	1	1	1	-0.391	1	1	1
400	2	73	2	4	2	2	1	0	3	1	1	1	1	2	2	4	1	1	1	0.8281	0	0	0
401	1	91	1	4	2	4	2	1	3	1	1	1	3	1	3	4	1	1	1	0.057344	1	1	1
402	2	72	2	4	2	3	2	0	3	1	5	0	1	1	1	1	1	0	1	1	0	0	0
403	1	71	1	2	2	3	1	1	1	1	5	1	2	1	1	1	1	0	1	0.701307	0	1	0
404	1	74	2	1	2	3	1	1	1	1	4	1	1	1	2	1	1	1	1	-0.102324	1	1	1
405	1	76	1	4	2	3	2	1	3	2	1	1	2	1	2	2	2	1	0	0.942318	0	0	0
406	1	65	2	2	2	3	2	0	2	1	2	1	1	1	1	1	1	0	0	0.844717	1	1	0
407	2	71	2	4	2	3	2	0	3	1	1	1	1	1	1	1	1	0	0	1	0	0	0
408	1	74	1	4	2	3	1	0	2	1	1	1	2	2	1	1	1	0	1	0.881836	1	1	1
409	1	83	1	2	2	4	2	0	1	1	5	1	2	2	1	1	1	0	0	1	0	0	0
410	2	61	1	4	2	3	2	0	3	1	2	1	1	1	1	1	1	0	0	1	0	0	0
411	2	72	3	1	2	3	2	1	3	2	2	1	1	1	2	2	1	1	1	0.746511	1	1	1
412	2	89	1	2	2	4	2	1	3	1	1	1	2	1	3	4	1	1	0	0.795789	0	0	0
413	2	84	1	3	2	4	1	0	3	1	5	1	4	2	1	1	1	0	0	0.942318	0	0	0
414	1	88	1	3	2	4	1	0	3	3	1	1	4	1	1	1	1	0	0	0.40081	0	0	0
415	1	87	1	3	2	3	1	1	3	1	1	0	4	2	1	1	3	0	0	0.792001	0	0	0
416	2	80	2	4	2	3	2	0	3	1	4	0	1	2	1	1	1	0	0	1	0	0	0
417	2	84	1	3	2	3	1	1	3	1	5	1	4	2	1	1	1	0	0	0.666768	1	1	1
418	1	85	1	4	2	4	1	0	3	1	5	1	3	2	1	1	1	0	0	1	0	0	0
419	2	86	1	3	2	2	1	1	3	1	5	1	3	2	3	2	2	1	0	0.83192	0	0	0
420	2	88	1	2	2	4	2	1	3	1	5	1	3	2	2	4	1	1	1	0.431808	1	1	1
421	2	82	1	4	2	4	1	1	3	1	3	1	3	2	2	4	1	1	0	0.812406	1	1	1
422	2	75	1	4	2	3	1	0	3	1	4	1	3	2	1	1	1	0	0	1	0	0	0
423	2	92	3	4	2	4	1	0	2	2	2	1	2	2	1	1	1	0	0	1	0	0	0
424	2	80	1	4	2	4	2	1	3	1	2	1	2	1	2	2	1	1	0	1	0	1	0
425	2	86	1	3	2	3	1	1	3	1	1	1	1	2	2	2	2	1	0	0.84199	0	0	0
426	2	83	1	4	2	2	1	0	3	1	5	1	3	2	1	1	1	0	0	1	0	0	0
427	2	72	2	3	2	2	1	1	3	1	3	1	1	2	2	3	2	1	0	1	0	0	0
428	1	70	2	2	2	3	1	1	1	1	1	0	1	2	2	3	2	1	0	0.934105	0	0	0
429	2	93	1	2	2	3	1	1	3	1	1	1	1	2	1	1	1	0	1	0.950722	0	1	0
430	2	88	1	4	2	3	1	0	3	1	2	1	3	2	1	1	1	0	0	1	0	0	0
431	2	78	1	3	2	4	1	0	3	1	2	1	4	2	1	1	1	0	0	1	0	0	0
432	1	88	1	2	2	4	1	1	3	2	1	1	4	2	2	3	1	1	0	0.934105	0	0	0
433	2	91	1	3	2	4	1	1	3	1	5	1	1	2	1	1	1	0	0	1	1	1	1
434	1	88	2	3	2	4	1	1	3	1	1	0	1	2	1	1	1	0	0	1	0	0	0
435	2	90	1	4	2	4	1	0	3	1	4	1	1	2	1	1	1	0	0	1	0	0	0
436	1	93	1	4	2	3	1	1	3	1	5	1	4	2	3	4	1	1	0	1	0	1	0
437	2	89	2	4	2	4	2	1	3	1	1	0	1	2	1	3	1	1	0	0.902399	0	1	0
