# Supplementary material for: Prevalence and associated factors of physical-psychological-cognitive multimorbidity in Chinese community-dwelling older adults: a cross-sectional study
Source: PeerJ journal article supplement (doi:10.7717/peerj.19750), 2025-07-24

Supplementary figure 1: Participant Recruitment Flow Diagram for the Study.

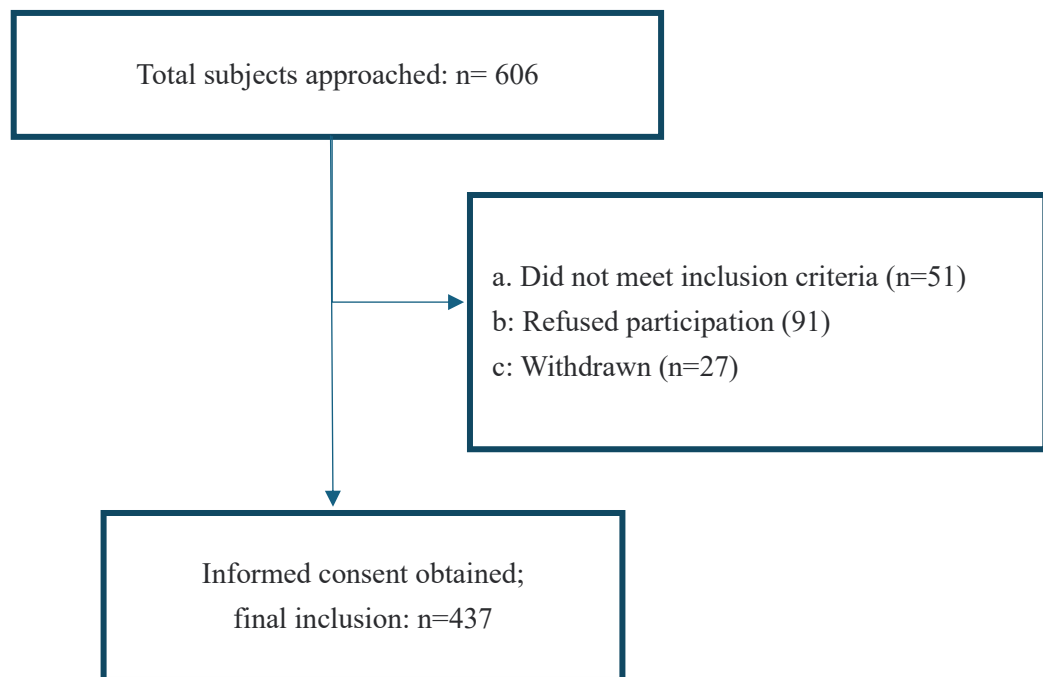

Supplement: Supplementary_figure_1.pdf [file Supplementary_figure_1.pdf]
